# Supplementary material for: Downexpression of miR-200c-3p Contributes to Achalasia Disease by Targeting the PRKG1 Gene
Source: MDPI journal article supplement (doi:10.3390/ijms24010668), 2022-12-30
Supplement: s1 [file s1]

**Supplementary Figure S1.** Expression profile of hsa-miR-200c-3p in both fibroblast and HEK293 cells transfected with miR-200c-3p mimic and miR-CNT mimic by quantitative PCR.

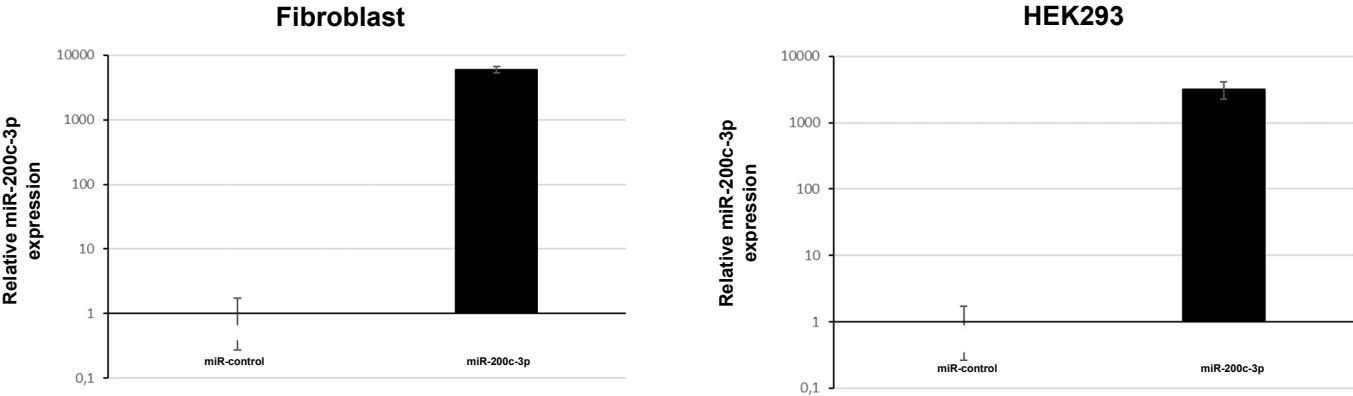

**Table S1. Sequences of primers used in this study.**

| Gene                 | Sequence                                            | Use         |
|----------------------|-----------------------------------------------------|-------------|
| PRKG1-3'UTR-(XhoI)-F | CGCGCGctcgagCAGGAAAAGTGAAGTGTGCAAGG                 | Cloning     |
| PRKG1-3'UTR-(XbaI)-R | CGCGCGtctagaGCATCCTGTTTTGTTGAGAGGTGC                | Cloning     |
| SYDE1-3'UTR-(XhoI)-F | CGCGCGctcgagGACCCCGGTTAGTAAGGACC                    | Cloning     |
| SYDE1-3'UTR-(XbaI)-R | CGCGCGtctagaCCACAAAGATGGAGGTGCGGAAAAG               | Cloning     |
| SULF1-3'UTR-(XhoI)-F | CGCGCGctcgagCACCGAAGTAATTCCAGCATAGC                 | Cloning     |
| SULF1-3'UTR-(XbaI)-R | CGCGCGtctagaTAAGCTTCTTAGTCATGCCAAGA                 | Cloning     |
| PRKG1-3'UTR-MUT-F    | TAGACTTGAATTAATGTCATAATTGTGAAAATTATGTCAACTGTACTGTT  | Mutagenesis |
| PRKG1-3'UTR-MUT-R    | AACAGTACAGTTGACATAATTTTCACAATTATGACATTAATTCAAGTCTA  | Mutagenesis |
| SYDE1-3'UTR-MUT-F    | GGCCCTCTTGCTGCTGCCAACCAAACTTTGAGCACTGCACTGTTTCTCCC  | Mutagenesis |
| SYDE1-3'UTR-MUT-R    | GGGAGAAACAGTGCAGTGCTCAAAGTTTGGTTGGCAGCAGCAAGAGGGCC  | Mutagenesis |
| SULF1-3'UTR-MUT-F    | GCTTGTTTGTGTTTGTGTTTGTACTAACTTTGAATATCGTAGGGACATAAG | Mutagenesis |
| SULF1-3'UTR-MUT-R    | CTTATGTCCCTACGATATTCAAAAGTTTAGTACAAAACAAACAAACAAGC  | Mutagenesis |
| PRKG1-RT-F1          | CGCAGACGTACAGGTCCTT                                 | qPCR        |
| PRKG1-RT-R1          | ATCCTTGGACCTTTCGGACTTG                              | qPCR        |
| SYDE-RT-F1           | TGCAGCGGTCTGCCTATCT                                 | qPCR        |
| SYDE-RT-R1           | GAGGATGCCAGTGATGACATTG                              | qPCR        |
| SULF1-RT-F1          | CCAGCAGAAGCCAAAGAAAGAG                              | qPCR        |
| SULF1-RT-R1          | TGTACTTTGGAGTCCCCTGGTTT                             | qPCR        |
| GAPDH-RT-F           | AATCCCATCACCATCTTCCA                                | qPCR        |
| GAPDH-RT-R           | AAATGAGCCCCAGCCTTC                                  | qPCR        |
| 18S-RT-F             | CCCAGTAAGTGCGGGTCATAA                               | qPCR        |
| 18S-RT-R             | ACGGGCGGTGTGTACAAAG                                 | qPCR        |
